# Supplementary material for: Gelatin methacryloyl hydrogels functionalized with endothelin-1 for angiogenesis and full-thickness wound healing
Source: Royal Society of Chemistry journal article supplement (doi:10.1039/d1tb00449b), 2021-01-01
Supplement: d1tb00449b1.pdf [file d1tb00449b1.pdf]

## Electronic Supplementary Information

### Gelatin methacryloyl hydrogels functionalized with endothelin-1 for angiogenesis and full-thickness wound healing

Meng-Na Li<sup>a</sup>, Hongping Yu<sup>b,c</sup>, Qin-Fei Ke<sup>a</sup>, Chang-Qing Zhang<sup>b</sup>, You-Shui Gao<sup>b,\*</sup>, Ya-Ping Guo<sup>a,\*</sup>

<sup>a</sup> The Education Ministry Key Lab of Resource Chemistry and Shanghai Key Laboratory of Rare Earth Functional Materials, Shanghai Normal University, Shanghai 200234, China

<sup>b</sup> Department of Orthopedic Surgery, Shanghai Jiao Tong University Affiliated Sixth People's Hospital, Shanghai 200233, China

<sup>c</sup> The First Affiliated Hospital of Xiamen University, Xiamen 361005, China

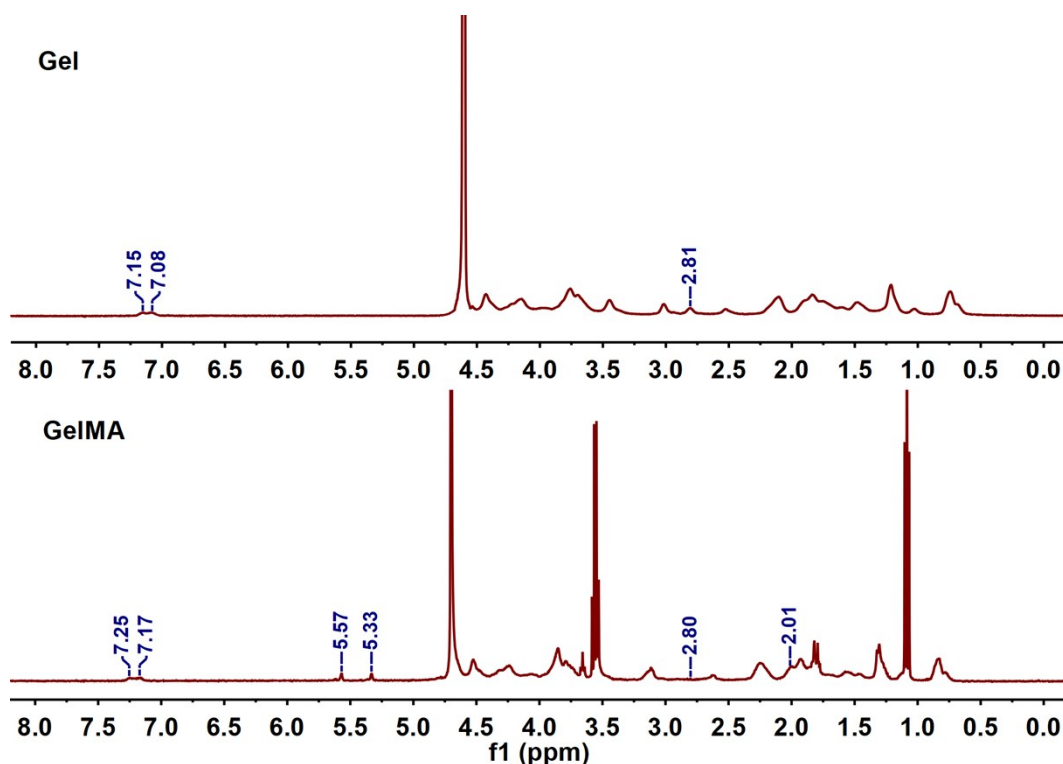

Fig. S1 <sup>1</sup>H-NMR spectra of gelatin and GelMA sponge.

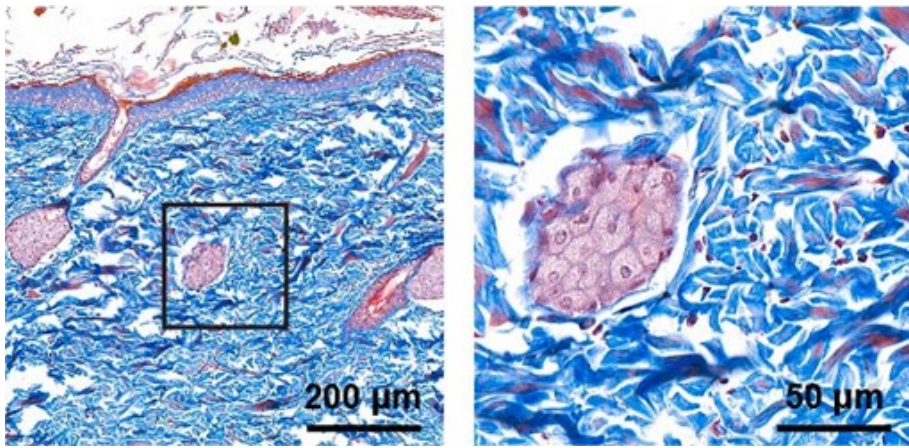

**Fig. S2** Masson's trichrome staining of normal skin.
